# Supplementary material
Source: ML conference proceedings conference paper supplement (https://openreview.net/forum?id=lr69PmF2Ov)
Supplement: supplementary_material [file attachment]

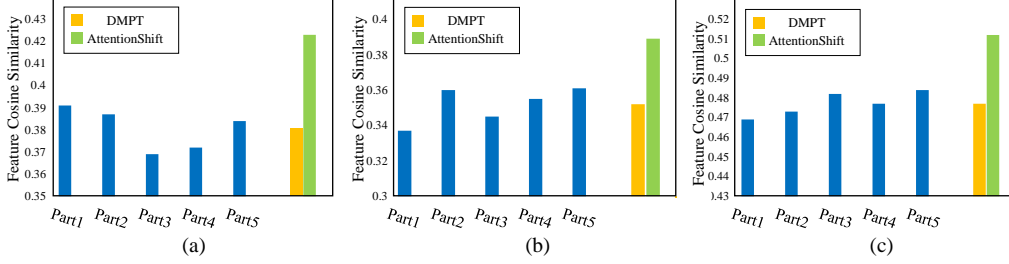

Figure 1: Statistics of feature similarity of DMPT and AttentionShift methods. Blue bar denotes the cosine similarity of features belonging to different part classifiers. Yellow bar and green bar are the average similarity of all foreground features of DMPT and AttentionShift, respectively. (a) Feature similarity between foreground and background. (b) Feature similarity among objects of different classes. (c) Feature similarity among parts of same object.

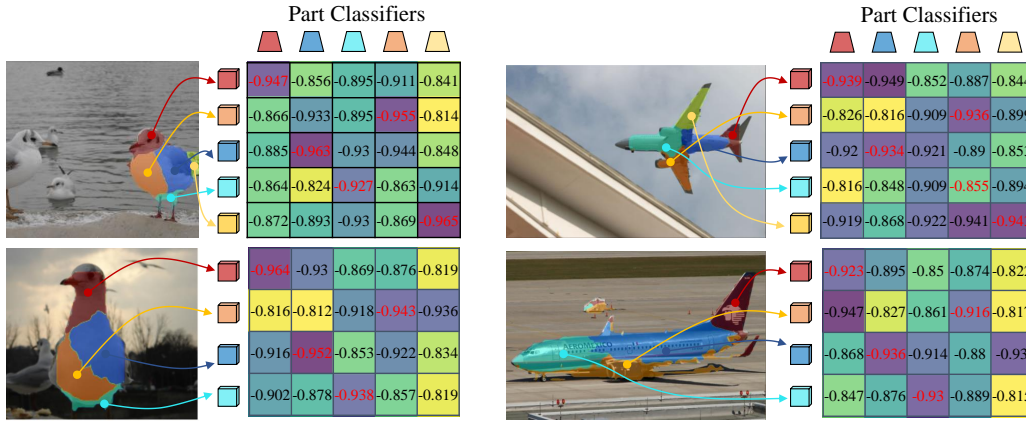

Figure 2: Visualization of cost matrix. Scores in red indicate the matched token-classifier pair.
